# Supplementary material
Source: Springer Nature journal article supplement (https://www.springermedizin.de/resource/supplementary/12865_2013_580_MOESM15_ESM.pdf/9428280)

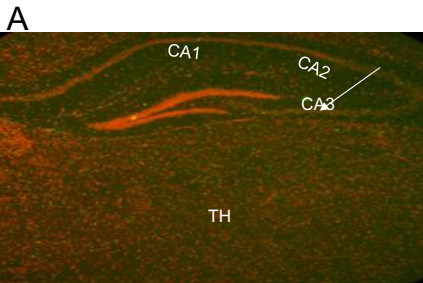

Binding all over mid brain and  
Hippocampus - 40X

D9

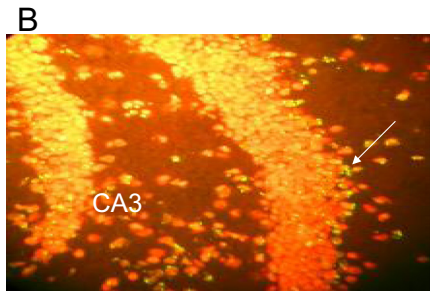

Hippocampus - 250X

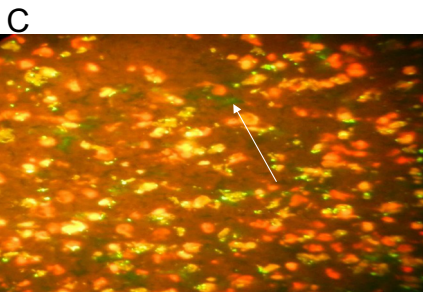

Cortex - 250X

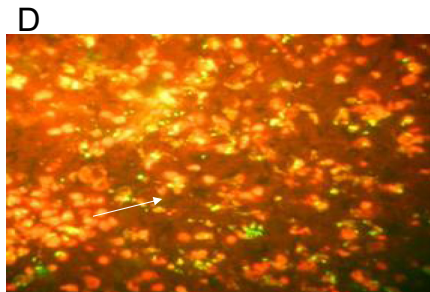

Amygdala - 250X

Supplement: MOESM15 [file 9428280]
